# Supplementary material for: Mutations in Protein-Binding Hot-Spots on the Hub Protein Smad3 Differentially Affect Its Protein Interactions and Smad3-Regulated Gene Expression
Source: PLoS One. 2011 Sep 19;6(9):e25021. doi: 10.1371/journal.pone.0025021 (PMC3176292; doi:10.1371/journal.pone.0025021)
Supplement: Table S3 — Primer and probe sequences used for RT and Q-RT-PCR. Primer and probe (where applicable) sequences used for RT and Q-RT-PCR. Probes were labeled with 5′ FAM and 3′ Iowa Black with an internal ZEN quencher. (XLS) [file pone.0025021.s004.xls]

## Sheet: Sheet1
Table S3: Primer and probe sequences used for RT and Q-RT-PCR
Gene	Accession number	Forward Primer Sequence (5'-3')	Reverse Primer Sequence (5'-3')	Probe Sequence (5'-3')
Actb	NM_007393	ACCTTCTACAATGAGCTGCG	CTGGATGGCTACGTACATGG	TCTGGGTCATCTTTTCACGGTTGGC
Pai1	NM_008871	TGCAAAAGGTCAGGATCGAG	ATTGTCTCTGTCGGGTTGTG
Cst6	NM_028623	TTCCGAGACACCAAAGTCATC	GGTGAGGTCCATGTGTTCTC
Mmp9	NM_013599	GATCCCCAGAGCGTCATTC	CCACCTTGTTCACCTCATTTTG	CGACATCTTCCAGTACCAAGACAAAGCC
Il11	NM_008350	TGGGACATTGGGATCTTTGC	CATTGTACATGCCGGAGGTAG	TGTGCTGACAAGGCTTCGAGTAGAC
Tnfaip6	NM_009398	CCTTTGCTTATGCGTCTTGC	GTAGGTGAGCTTGTATCTGCC	ATCCCGTTCTTGAATCCCCATCCG
Fermt1	NM_198029	TGCCAGATGTGAATGTATCGG	TTACCCTTCGATGCCAAGATG	CAAGTTACTAATCCCCGTTGCTGATGGT
Olfm2	NM_173777	ATCTCCAGTATGTTCGCAGC	GCTCTGTCATCCTGTCCTTC	CAGCCGATGGGTCAGTCTCAGC
Wnt11	NM_009519	CCAAGCCAATAAACTGATGCG	GGCATTTACACTTCGTTTCCAG	AGCCTGTCTCCCCACTTCACTG
Adamts4	NM_172845	CTGGGTATGGCTGATGTGG	AGTGCATGGCTTGGAGTTATC
Clu	NM_013492	AAAGTGCCAGGAGATCTTGTC	CATGTTCGACTGGAAGGACTG
Edn1	NM_010104	GTGTCTACTTCTGCCACCTG	CACTGACATCTAACTGCCTGG
Gfpt2	NM_013529	ACCATTGAACTTCCCCACAC	TTCTCATTCCACAGTGACAGAC
Myl1	NM_021285	GAGGAAGAGGTAGAAGCGTTG	ACATTGCGTGCTTGAAAACTC
Npy	NM_023456	GACAGAGATATGGCAAGAGATCC	TGGAAAAGTCGGGAGAACAAG
Pdgfb	NM_011057	CCTGCAAGTGTGAGACAGTAG	CTTTCGGTGCTTGCCTTTG
Sgcg	NM_011892	GTGGACTCATCTCTGCTTCTG	TGATCTGAAAGTGCTGGCTC
Primer and probe (where applicable) sequences used for RT and Q-RT-PCR. Probes were labeled with 5’ FAM and 3’ Iowa Black with an internal ZEN quencher.
